# Supplementary material for: In vivo characterization of an Hfq protein encoded by the Bacillus anthracis virulence plasmid pXO1
Source: PubMed Central journal article supplement (PMC5348863; doi:10.1186/s12866-017-0973-y), 2017-03-14
Supplement: 12866_2017_973_MOESM1_ESM.pdf [file 12866_2017_973_MOESM1_ESM.pdf]

## Additional file 1

**Table S1.  $\beta$ -galactosidase assay result summary.** Results from two independent trials of the  $\beta$ -galactosidase assay depicted in Fig. 5B. (Each trial involved triplicate independent transformants for each mutant). In these assays, Miller units for each sample were corrected by first subtracting the value for the Hfq1 strain (used as a negative control), and then were compared to the corrected value for the wild-type Hfq3 strain, set to 100%. Mutants with negative values exhibited lower expression than the Hfq1 control strain. While we observed some variability in the signal as a percentage of the wild-type Hfq3 signal between trials, the same rank order of mutant expression levels was observed in each trial.

| Hfq3 Mutant   | Percent of $\beta$ -galactosidase Signal, Trial 1 | Percent of $\beta$ -galactosidase Signal, Trial 2 |
|---------------|---------------------------------------------------|---------------------------------------------------|
| K53A          | 107                                               | 63                                                |
| Q4A           | 68                                                | 35                                                |
| R27A          | 23                                                | 23                                                |
| F21D          | 20                                                | 10                                                |
| Rim Revertant | 10                                                | 5                                                 |
| V26D          | -5                                                | -8                                                |

**Table S2. Plasmids created in this study.**

| Plasmid Name | Construction                                                 | Description                                                  | Antibiotic Resistance | Origin             |
|--------------|--------------------------------------------------------------|--------------------------------------------------------------|-----------------------|--------------------|
| pABK001      | pSW4-Hfq3<br>(cloning between <i>NdeI</i> and <i>BamHI</i> ) | For sodium bicarbonate and CO <sub>2</sub> driven expression | Kan <sup>R</sup>      | This work          |
| pABK002      | pSW4-Hfq2<br>(cloning between <i>NdeI</i> and <i>BamHI</i> ) | For sodium bicarbonate and CO <sub>2</sub> driven expression | Kan <sup>R</sup>      | This work          |
| pABK003      | pSW4-Hfq3-Q4A                                                | For sodium bicarbonate and CO <sub>2</sub> driven expression | Kan <sup>R</sup>      | NEB Q5 mutagenesis |

|         |                                                                    |                                                              |                  |                        |
|---------|--------------------------------------------------------------------|--------------------------------------------------------------|------------------|------------------------|
| pABK004 | pSW4-Hfq3-K53A                                                     | For sodium bicarbonate and CO <sub>2</sub> driven expression | Kan <sup>R</sup> | NEB Q5 mutagenesis     |
| pABK005 | pSW4-Hfq3-ED Patch                                                 | For sodium bicarbonate and CO <sub>2</sub> driven expression | Kan <sup>R</sup> | NEB Q5 mutagenesis     |
| pABK006 | pSW4-Hfq3-F21D                                                     | For sodium bicarbonate and CO <sub>2</sub> driven expression | Kan <sup>R</sup> | NEB Q5 mutagenesis     |
| pABK007 | pSW4-Hfq3-V26D                                                     | For sodium bicarbonate and CO <sub>2</sub> driven expression | Kan <sup>R</sup> | NEB Q5 mutagenesis     |
| pABK008 | pSW4-Hfq3-R27A                                                     | For sodium bicarbonate and CO <sub>2</sub> driven expression | Kan <sup>R</sup> | NEB Q5 mutagenesis     |
| pABK009 | pSW4-Hfq3-Rim                                                      | For sodium bicarbonate and CO <sub>2</sub> driven expression | Kan <sup>R</sup> | NEB Q5 mutagenesis     |
| pABK010 | pSW4-GFP                                                           | For sodium bicarbonate and CO <sub>2</sub> driven expression | Kan <sup>R</sup> | DNA2.0 (Newark, CA)    |
| pCV001  | pQE80-T5-His-Hfq1 (cloning between <i>Bam</i> HI and <i>Sall</i> ) | For <i>in vivo</i> experiments in <i>E. coli</i>             | Amp <sup>R</sup> | (Vrentas et al., 2015) |
| pCV003  | pQE80-T5-His-Hfq3 (cloning between <i>Bam</i> HI and <i>Sall</i> ) | For <i>in vivo</i> experiments in <i>E. coli</i>             | Amp <sup>R</sup> | (Vrentas et al., 2015) |
| pCV016  | pQE80-His-Hfq3-Q4A                                                 | For <i>in vivo</i> experiments in <i>E. coli</i>             | Amp <sup>R</sup> | (Vrentas et al., 2015) |
| pABK011 | pQE80-His-Hfq3-K53A                                                | For <i>in vivo</i> experiments in <i>E. coli</i>             | Amp <sup>R</sup> | NEB Q5 mutagenesis     |
| pABK012 | pQE80-His-Hfq3-F21D                                                | For <i>in vivo</i> experiments in <i>E. coli</i>             | Amp <sup>R</sup> | NEB Q5 mutagenesis     |

|         |                     |                                                  |                  |                    |
|---------|---------------------|--------------------------------------------------|------------------|--------------------|
| pABK013 | pQE80-His-Hfq3-V26D | For <i>in vivo</i> experiments in <i>E. coli</i> | Amp <sup>R</sup> | NEB Q5 mutagenesis |
| pABK014 | pQE80-His-Hfq3-R27A | For <i>in vivo</i> experiments in <i>E. coli</i> | Amp <sup>R</sup> | NEB Q5 mutagenesis |
| pABK015 | pQE80-His-Hfq3-Rim  | For <i>in vivo</i> experiments in <i>E. coli</i> | Amp <sup>R</sup> | NEB Q5 mutagenesis |

**Table S3. Bacterial strains utilized and/or created in this study.**

| Strain Name          | Genetic Background                                                              | Other Plasmids and Antibiotic Resistance | Source                                                  |
|----------------------|---------------------------------------------------------------------------------|------------------------------------------|---------------------------------------------------------|
| TOP10                | <i>E. coli</i>                                                                  | None                                     | Thermo Fisher                                           |
| SCS110               | <i>E. coli</i>                                                                  | None                                     | Agilent Technologies                                    |
| Ames 35              | <i>B. anthracis</i> pXO1 <sup>+</sup> , pXO2 <sup>-</sup>                       | None                                     | Lab Collection, derived from Green <i>et al.</i> (1985) |
| Ames 35 $\Delta$ hfq | <i>B. anthracis</i> pXO1 <sup>+</sup> , pXO2 <sup>-</sup> $\Delta$ hfq1hfq2hfq3 | None                                     | Lab Collection, derived from Green <i>et al.</i> (1985) |
| PY79                 | <i>B. subtilis</i>                                                              | None                                     | (Zeigler <i>et al.</i> , 2008)                          |
| ABK001               | Ames 35                                                                         | pSW4-Hfq3; Kan <sup>R</sup>              | This work                                               |
| ABK002               | Ames 35                                                                         | pSW4-Hfq2; Kan <sup>R</sup>              | This work                                               |
| ABK003               | Ames 35                                                                         | pSW4-Hfq3-Q4A; Kan <sup>R</sup>          | This work                                               |
| ABK004               | Ames 35                                                                         | pSW4-Hfq3-K53A; Kan <sup>R</sup>         | This work                                               |
| ABK005               | Ames 35                                                                         | pSW4-Hfq3-ED Patch; Kan <sup>R</sup>     | This work                                               |
| ABK006               | Ames 35                                                                         | pSW4-Hfq3-F21D; Kan <sup>R</sup>         | This work                                               |
| ABK007               | Ames 35                                                                         | pSW4-Hfq3-V26D; Kan <sup>R</sup>         | This work                                               |
| ABK008               | Ames 35                                                                         | pSW4-Hfq3-R27A; Kan <sup>R</sup>         | This work                                               |

|        |                                                           |                                           |                                                 |
|--------|-----------------------------------------------------------|-------------------------------------------|-------------------------------------------------|
| ABK009 | Ames 35                                                   | pSW4-Hfq3-Rim;<br>Kan <sup>R</sup>        | This work                                       |
| ABK010 | Ames 35                                                   | pSW4-GFP; Kan <sup>R</sup>                | This work                                       |
| YN585  | <i>E. coli</i> MG1655 <i>rpoS-lacZ</i><br><i>hfq::cat</i> | Cm <sup>R</sup>                           | S. Gottesman Lab<br>(Wassarman et al.,<br>2001) |
| CEV017 | YN585                                                     | pQE80-His-Hfq1;<br>Amp <sup>R</sup>       | (Vrentas et al.,<br>2015)                       |
| CEV019 | YN585                                                     | pQE80-His-Hfq3;<br>Amp <sup>R</sup>       | (Vrentas et al.,<br>2015)                       |
| CEV028 | YN585                                                     | pQE80-His-Hfq3-<br>Q4A; Amp <sup>R</sup>  | (Vrentas et al.,<br>2015)                       |
| ABK011 | YN585                                                     | pQE80-His-Hfq3-<br>K53A; Amp <sup>R</sup> | This work                                       |
| ABK012 | YN585                                                     | pQE80-His-Hfq3-<br>F21D; Amp <sup>R</sup> | This work                                       |
| ABK013 | YN585                                                     | pQE80-His-Hfq3-<br>V26D; Amp <sup>R</sup> | This work                                       |
| ABK014 | YN585                                                     | pQE80-His-Hfq3-<br>R27A; Amp <sup>R</sup> | This work                                       |
| ABK015 | YN585                                                     | pQE80-His-Hfq3-<br>Rim; Amp <sup>R</sup>  | This work                                       |

**Table S4. Primers utilized in this study.**

| <b>Primer Name</b> | <b>Sequence (5'--&gt; 3')</b>  | <b>Primer Use</b>                                  |
|--------------------|--------------------------------|----------------------------------------------------|
| Pr001              | AAACGGCGTAGCAGTACCTGGAATC      | Forward<br>Primer, Q5<br>mutagenesis,<br>Hfq3-R27A |
| Pr002              | ATTAAAAATATCGTTACTAATCTTTGTTTC | Reverse<br>Primer, Q5<br>mutagenesis,<br>Hfq3-R27A |

|        |                                                          |                                                             |
|--------|----------------------------------------------------------|-------------------------------------------------------------|
| Pr003  | GATGCATACAGCAGAAGATTTTTACAACAAAT<br>TAATAG               | Forward<br>Primer, Q5<br>mutagenesis,<br>pSW4-Hfq3-<br>Q4A  |
| Pr004  | ATATGCGTTCTCCTTTTTG                                      | Reverse<br>Primer, Q5<br>mutagenesis,<br>pSW4-Hfq3-<br>Q4A  |
| CEV019 | ATGCATACAGCAGAAGATTTTTACAAC                              | Forward<br>Primer, Q5<br>mutagenesis,<br>pQE80-Hfq3-<br>Q4A |
| CEV020 | GGATCCGTGATGGTGATGGTGATG                                 | Reverse<br>Primer, Q5<br>mutagenesis,<br>pQE80-Hfq3-<br>Q4A |
| Pr005  | CAACAAATTACGTCGTGAACAAAGATTAGTAACG<br>ATATTTTTAATAAACGGC | Forward<br>Primer, Q5<br>mutagenesis,<br>Hfq3-Rim           |
| Pr006  | TAAAAATCTTCTTGTGTATGCATTTATAAAG                          | Reverse<br>Primer, Q5<br>mutagenesis,<br>Hfq3-Rim           |
| Pr007  | ATTCATTTATGCGCATGCTATTTCAACAG                            | Forward<br>Primer, Q5<br>mutagenesis,<br>Hfq3-K53A          |
| Pr008  | TGTTGCTTTCCATGACTG                                       | Reverse<br>Primer, Q5<br>mutagenesis,<br>Hfq3-K53A          |
| Pr009  | AGTAACGATAGATTTAATAAACGGCGTAAG                           | Forward<br>Primer, Q5<br>mutagenesis,<br>Hfq3-F21D          |

|       |                                     |                                                        |
|-------|-------------------------------------|--------------------------------------------------------|
| Pr010 | AATCTTTGTTCTCTATTAATTTG             | Reverse<br>Primer, Q5<br>mutagenesis,<br>Hfq3-F21D     |
| Pr011 | AATAAACGGCGATAGAGTACCTG             | Forward<br>Primer, Q5<br>mutagenesis,<br>Hfq3-V26D     |
| Pr012 | AAAAATATCGTTACTAATCTTTGTTT          | Reverse<br>Primer, Q5<br>mutagenesis,<br>Hfq3-V26D     |
| Pr013 | GCATACACAAGCAGCATTTTACAACAAATTAATAG | Forward<br>Primer, Q5<br>mutagenesis,<br>Hfq3-ED Patch |
| Pr014 | ATCATATGCGTTCTCCTTTTTG              | Reverse<br>Primer, Q5<br>mutagenesis,<br>Hfq3-ED Patch |

**Table S5. MIC ( $\mu\text{g}/\text{mL}$ ) of cell wall-targeting antibiotics for Hfq3 and GFP overexpression strains.**

| <b>Antibiotic</b> | <b>Strain</b> | <b>Plasmid</b> | <b>MIC (<math>\mu\text{g}/\text{ml}</math>)</b> |
|-------------------|---------------|----------------|-------------------------------------------------|
| Ampicillin        | Ames 35       | pSW4-Hfq3      | $\leq 0.06-0.125$                               |
|                   | Ames 35       | pSW4-GFP       | 0.03-0.125                                      |
| Vancomycin        | Ames 35       | pSW4-Hfq3      | 1.0-2.0                                         |
|                   | Ames 35       | pSW4-GFP       | 2.0-4.0                                         |

### **Supplemental References**

Green BD, Battisti L, Koehler TM, Thorne CB, Ivins BE. Demonstration of a capsule plasmid in *Bacillus anthracis*. Infect Immun.1985;49:291-7.

Vrentas C, Ghirlando R, Keefer A, Hu Z, Tomczak A, Gittis A, Garboczi DN, Gottesman S, Leppla SH. Hfq in *Bacillus anthracis*: Role of protein sequence variation in the structure and function of proteins in the Hfq family. Protein Sci. 2015;24:1808-19.

Wassarman KM, Repoila F, Rosenow C, Storz G, Gottesman S. Identification of novel small RNAs using comparative genomics and microarrays. Genes Dev. 2001;15:1637-51.

Zeigler DR, Prágai Z, Rodriguez S, Chevreux B, Muffler A, Albert T, Bai R, Wyss M, Perkins JB. The origins of 168, W23, and other *Bacillus subtilis* legacy strains. J Bacteriol. 2008;190:6983-95.
