# Supplementary material for: In vivo characterization of an Hfq protein encoded by the Bacillus anthracis virulence plasmid pXO1
Source: PubMed Central journal article supplement (PMC5348863; doi:10.1186/s12866-017-0973-y), 2017-03-14
Supplement: 12866_2017_973_MOESM3_ESM.pdf [file 12866_2017_973_MOESM3_ESM.pdf]

### **Additional file 3: Experiment 1. RNA-Seq Comparison of Wild-type *B. anthracis* to $\Delta hfq3$ *B. anthracis***

**Strain Information:** The wild-type (parent) strain used in these experiments was the same Ames 35 strain described in the main paper. A deletion of the *hfq3* gene on the pXO1 plasmid was created by *loxP* recombination using a spectinomycin resistance cassette flanked by PCR fragments from the *hfq3* gene; the associated  $\Delta hfq1hfq2hfq3$  mutant derived from this deletion was previously reported in [1]. Three independent colonies from the Ames 35 glycerol stock and the Ames 35- $\Delta Hfq3$  glycerol stock were selected from an LB streak plate, cultured overnight in air in LB broth, and inoculated to an  $OD_{600} < 0.02$  in 10 ml NBY + bicarbonate (as described in the main Methods). Cultures were grown to  $OD_{600}$  values of 0.9-1.2 in a 15%  $CO_2$  environment, mixed with 10 volumes of RNAprotect, and pelleted to recover cells at room temperature. Cell pellets were resuspended in Trizol, flash frozen, and stored at  $-80^\circ C$ .

Additionally, due to the high frequency of Spo- mutations that occur in the *spo0A* gene in *B. anthracis* cultures [2, 3], we performed growth curves and RNA extractions of an Ames35-Spo0A mutant (Spo-strain) in parallel, and two replicates of libraries prepared from this strain in parallel were used for comparison, as described below.

**Methodology:** RNA samples were prepared from Trizol pellets by glass bead homogenization and use of the All Prep DNA/RNA kit (Qiagen) as described in detail in McKenzie et al. [4]. Ribosomal RNA was depleted with the MicrobEnrich kit (Life Technologies) and libraries were prepared using the TruSeq DNA Sample Preparation kit (Illumina) as described in detail in McKenzie et al. [4]. Libraries were run as 2x100 bp paired-end on two lanes of an Illumina HiSeq 2500 sequencer, generating on average 14.25 million reads per sample. Raw reads were trimmed for adapter sequence, poor quality sequence, and filtered for overall low quality using the Fastx Toolkit suite of tools (Hannon Lab, CSHL). Remaining reads were mapped to the *Bacillus anthracis* str. 'Ames Ancestor' genome (NC\_007530.2) and plasmid pXO1 (NC\_007332.2) using Bowtie2 [5], using default parameters except using --no-mixed. Reads mapping to genes were counted using a proprietary perl script. Differential gene expression between two wild-type and two  $\Delta Hfq3$  replicates or two Spo0A mutant replicates was determined using the exactTest function in EdgeR [6].

**Presentation of Data Table:** In the data table below, we selected the genes that were scored as differentially expressed by the EdgeR analysis method. The  $\log_2(\text{Fold change})$  is presented for the comparison of  $\Delta Hfq3$  to wild-type, so positive numbers indicate increased gene expression, or upregulation as compared to wild-type Ames 35, and negative numbers indicate decreased gene expression in the comparisons, or downregulation. We also looked to see if each gene was scored as showing a significant difference in expression in the Spo0A mutant vs. wild-type Ames35 comparison. Genes with a "no" in the Spo0A column were only significantly different in the Hfq3, but not the Spo0A, mutants. While the Hfq3 mutant strains that were analyzed here were Spo+, this analysis selects for gene candidates that are the least likely to have differential expression due to the occurrence of spontaneous Spo- mutants in the cell population.

We highlighted genes that were significantly differentially expressed (as compared to wild-type) only in the Hfq3 mutant strain in light blue; medium blue highlighting indicates that the  $\log_2(\text{Fold change})$  for the Hfq3 mutant comparison and the  $\log_2(\text{Fold change})$  for the Spo0A mutant comparison were at least 2 units apart. These medium blue genes, then, represent the preliminary candidates of greatest interest for future studies.

The expression analysis also confirmed that Hfq3 was expressed in the cells and that no Hfq3 transcripts were observed in the Hfq3 mutant.

**Analysis:** Multiple metabolic genes (especially fatty acid metabolism genes) and membrane-associated and/or transporter genes were identified from this preliminary analysis as potentially being differentially expressed. We show here only the subset of differentially expressed genes that were upregulated greater than 5.6-fold ( $2^{2.5}$ ) or downregulated greater than 5.6-fold in the Hfq3 mutant. Many more candidates of interest were identified as being upregulated (vs. downregulated) in the Hfq3 mutant, which would suggest that Hfq3 has a negative effect on gene expression of these genes, consistent with a model by which Hfq binds to RNAs in the cell and accelerates their degradation. Alternatively, this could be explained by regulation of the synthesis of a transcriptional regulator. 26 genes are highlighted as medium blue, of particular interest as candidates; this includes 13 uncharacterized protein-encoding genes.

Additionally, we included the decrease in gene expression observed for the MreBCD proteins, which was below the 5.6-fold threshold, but whose expression was statistically significant for each of the genes of this operon, and distinct from the regulatory profile in the Spo- comparison strain. For example, the expression level of the essential gene *mreC* was 3.7-fold higher in the wild-type Ames 35 strain as compared to the Hfq3 mutant.

We also conducted a SNP analysis on the reads from the RNA-Seq experiment, providing a look at the variability of the mutant strains. With a mutation rate in the range of 0.001-0.004 base changes per generation, >1 SNP would be expected during the creation and passage of the mutant strains. The second table below depicts non-synonymous SNPs that were identified in the mutant strains as compared to the Ames Ancestor genome that was used for alignment. Two SNPs were noted in the wild-type strain that are also observed in each of the other mutants, confirming that the mutants were derived from this parent. Note that in the Ames35-ΔHfq3 strains, two additional SNPs were noted, one in a hypothetical protein and one in a glutaminase gene. Future analysis might be best done by moving the Hfq3 deletion to another background or by whole-genome sequencing of a series of mutant isolates to identify cultures that are 100% isogenic to the wild-type for comparison, to confirm that these differentially expressed gene candidates are indeed the result of the Hfq3 deletion.

#### Differentially Expressed Gene Candidates: Comparison of wild-type Ames 35 and Ames 35-ΔHfq3

| Original Gene Tag | Locus Tag (New Nomenclature) | Gene Description                                  | Log <sub>2</sub> (Fold Change) | Sig. Change in ΔSpo0A? |
|-------------------|------------------------------|---------------------------------------------------|--------------------------------|------------------------|
| GBAA_1061         | GBAA_RS05565                 | Lipoprotein                                       | 4.7                            | Yes, 4.8               |
| GBAA_4175         | ---                          | Uncharacterized protein                           | 4.4                            | No                     |
| GBAA_0660         | GBAA_RS03585                 | Oligopeptide ABC transporter, ATP-binding protein | 4.3                            | No                     |
| GBAA_0659         | GBAA_RS03580                 | Oligopeptide ABC transporter, ATP-binding protein | 4.3                            | No                     |
| GBAA_2552         | GBAA_RS12615                 | <b>yngE</b> ; Carboxyl transferase domain protein | 4.1                            | No                     |
| GBAA_4176         | GBAA_RS20285                 | Hypothetical protein                              | 4.0                            | Yes                    |

|           |              |                                                                      |     |          |
|-----------|--------------|----------------------------------------------------------------------|-----|----------|
| GBAA_4240 | GBAA_RS20590 | <b>thIA</b> ; Acetyl-CoA acetyltransferase                           | 4.0 | No       |
| GBAA_2551 | GBAA_RS12610 | <b>yngF</b> ; Enoyl-CoA hydratase                                    | 4.0 | No       |
| GBAA_3094 | GBAA_RS15180 | Uncharacterized membrane protein                                     | 4.0 | Yes, 2.7 |
| GBAA_0658 | GBAA_RS03575 | <b>oppB</b> ; Oligopeptide ABC transporter, permease protein         | 3.9 | No       |
| GBAA_0556 | GBAA_RS03080 | <b>yuaF</b> ; Phosphate ABC transporter permease                     | 3.9 | No       |
| GBAA_2547 | GBAA_RS12590 | Acyl-CoA dehydrogenase                                               | 3.8 | No       |
| GBAA_1091 | GBAA_RS05705 | Long-chain fatty acid CoA ligase                                     | 3.7 | No       |
| GBAA_2550 | GBAA_RS12605 | <b>mvaB</b> ; Hydroxymethylglutaryl-CoA ligase                       | 3.7 | No       |
| GBAA_0557 | GBAA_RS03085 | <b>yuaG</b> ; Flotillin family                                       | 3.6 | No       |
| GBAA_3093 | GBAA_RS15175 | Membrane permease                                                    | 3.6 | No       |
| GBAA_5590 | GBAA_RS27230 | <b>fadF</b> ; Ferredoxin, 4Fe-4S                                     | 3.6 | Yes, 3.3 |
| GBAA_3095 | GBAA_RS15185 | LamB/YcsF family protein                                             | 3.6 | Yes, 2.8 |
| GBAA_0657 | GBAA_RS03570 | Oligopeptide ABC transporter, permease protein                       | 3.5 | No       |
| GBAA_2548 | GBAA_RS12595 | <b>accC2</b> ; Acetyl-CoA carboxylase biotin carboxylase subunit     | 3.5 | No       |
| GBAA_1329 | GBAA_RS06775 | <b>phaR</b> ; Polyhydroxyalkanoic acid synthase subunit              | 3.5 | No       |
| GBAA_3096 | GBAA_RS15190 | <b>kipA</b> ; Urea amidolyase                                        | 3.4 | Yes, 3.0 |
| GBAA_5249 | GBAA_RS25620 | <b>fadN</b> ; 3-hydroxyacyl-CoA dehydrogenase                        | 3.4 | Yes, 4.1 |
| GBAA_2296 | GBAA_RS11405 | CoA-transferase subunit beta                                         | 3.3 | No       |
| GBAA_4799 | GBAA_RS23310 | Uncharacterized protein                                              | 3.3 | No       |
| GBAA_2549 | GBAA_RS12600 | Acetyl-CoA carboxylase biotin carboxyl carrier protein subunit       | 3.3 | No       |
| GBAA_0312 | GBAA_RS01760 | <b>metN2</b> ; Methionine import ATP-binding protein                 | 3.2 | Yes, 2.7 |
| GBAA_5589 | GBAA_RS27225 | Acetyl-CoA acetyltransferase                                         | 3.2 | Yes, 2.8 |
| GBAA_0656 | GBAA_RS03565 | <b>oppA</b> ; Oligopeptide ABC transporter substrate binding protein | 3.2 | No       |
| GBAA_5536 | GBAA_RS26975 | <b>nuoJ</b> ; NADH dehydrogenase subunit J                           | 3.1 | No       |
| GBAA_2118 | GBAA_RS10560 | Uncharacterized membrane protein                                     | 3.1 | No       |
| GBAA_4617 | GBAA_RS22450 | Uncharacterized protein                                              | 3.1 | Yes, 3.3 |
| GBAA_0540 | GBAA_RS02990 | Uncharacterized protein                                              | 3.1 | No       |
| GBAA_3645 | GBAA_RS17720 | Oligopeptide ABC transporter substrate-binding protein               | 3.1 | No       |
| GBAA_5538 | GBAA_RS26985 | <b>nuoH</b> ; NADH dehydrogenase subunit H                           | 3.1 | Yes, 2.2 |

|           |              |                                                             |     |          |
|-----------|--------------|-------------------------------------------------------------|-----|----------|
| GBAA_5539 | GBAA_RS26990 | <b>nuoD</b> ; NADH dehydrogenase subunit D                  | 3.0 | Yes, 2.5 |
| GBAA_4927 | GBAA_RS23920 | Hypothetical protein                                        | 3.0 | No       |
| GBAA_4800 | GBAA_RS23315 | Hypothetical protein                                        | 3.0 | No       |
| GBAA_0174 | GBAA_RS01000 | ABC transporter ATP-binding protein                         | 3.0 | Yes, 3.1 |
| GBAA_4928 | GBAA_RS23925 | Uncharacterized protein                                     | 2.9 | No       |
| GBAA_4174 | GBAA_RS20275 | Hypothetical protein                                        | 2.9 | No       |
| GBAA_5123 | GBAA_RS24880 | <b>glgB</b> ; Glycogen branching protein                    | 2.9 | Yes, 3.9 |
| GBAA_0887 | GBAA_RS04780 | <b>eag</b> ; S-layer protein EA1                            | 2.9 | No       |
| GBAA_0604 | GBAA_RS03310 | <b>yoaR</b> ; Vancomycin resistance protein                 | 2.9 | Yes, 2.8 |
| GBAA_1330 | GBAA_RS06780 | <b>fabG</b> ; Acetoacetyl-CoA reductase                     | 2.9 | No       |
| GBAA_5542 | GBAA_RS27005 | <b>nuoA</b> ; NADH dehydrogenase subunit A                  | 2.9 | Yes, 2.8 |
| GBAA_5588 | GBAA_RS27220 | <b>mmgB</b> ; 3-hydroxyacyl-CoA dehydrogenase               | 2.9 | Yes, 2.6 |
| GBAA_5535 | GBAA_RS26970 | <b>nuoK</b> ; NADH dehydrogenase subunit K                  | 2.9 | No       |
| GBAA_3646 | GBAA_RS17725 | Hypothetical protein                                        | 2.9 | No       |
| GBAA_2553 | GBAA_RS12620 | <b>acsA</b> ; Acetoacetyl-CoA synthase                      | 2.9 | No       |
| GBAA_5587 | GBAA_RS27215 | Acyl-CoA dehydrogenase                                      | 2.8 | No       |
| GBAA_1331 | GBAA_RS06785 | <b>phaC</b> ; poly(R)-hydroxyalkanoic acid synthase subunit | 2.8 | No       |
| GBAA_5248 | GBAA_RS25615 | <b>fadA</b> ; Acetyl-CoA acetyltransferase                  | 2.8 | Yes, 3.3 |
| GBAA_5523 | GBAA_RS26905 | Hypothetical protein                                        | 2.8 | No       |
| GBAA_3488 | GBAA_RS16995 | Hypothetical protein                                        | 2.8 | No       |
| GBAA_2029 | GBAA_RS10125 | Uncharacterized secreted protein                            | 2.8 | No       |
| GBAA_3110 | GBAA_RS15250 | Histidine transporter                                       | 2.8 | No       |
| GBAA_5537 | GBAA_RS26980 | <b>nuoI</b> ; NADH dehydrogenase subunit I                  | 2.8 | No       |
| GBAA_3491 | GBAA_RS17010 | Uncharacterized membrane protein                            | 2.8 | No       |
| GBAA_0313 | GBAA_RS01765 | ABC transporter permease                                    | 2.7 | Yes, 2.6 |
| GBAA_4204 | GBAA_RS20415 | Short chain dehydrogenase                                   | 2.7 | Yes, 2.7 |
| GBAA_0894 | GBAA_RS04810 | Enoyl-CoA hydratase                                         | 2.7 | No       |
| GBAA_3258 | GBAA_RS15915 | <b>yvqJ</b> ; MFS transporter                               | 2.7 | Yes, 4.5 |
| GBAA_5540 | GBAA_RS26995 | NADH dehydrogenase subunit C                                | 2.7 | Yes, 2.7 |
| GBAA_4060 | GBAA_RS19730 | Uncharacterized N-acetyltransferase                         | 2.7 | Yes, 2.9 |
| GBAA_0186 | GBAA_RS01055 | Oligopeptide ABC transporter permease                       | 2.7 | Yes, 2.2 |
| GBAA_4514 | GBAA_RS21960 | <b>cccA</b> ; Cytochrome c-550                              | 2.6 | Yes, 3.0 |
| GBAA_5046 | GBAA_RS24500 | Hypothetical protein                                        | 2.6 | No       |
| GBAA_3712 | GBAA_RS18050 | <b>hutH</b> ; Histidine ammonia-lyase                       | 2.6 | Yes, 2.7 |

|           |              |                                                           |     |          |
|-----------|--------------|-----------------------------------------------------------|-----|----------|
| GBAA_5496 | GBAA_RS26775 | ABC transporter ATP-binding protein                       | 2.6 | No       |
| GBAA_5497 | GBAA_RS26780 | <b>yknX</b> ; RND family efflux transporter MFP subunit   | 2.6 | No       |
| GBAA_4893 | GBAA_RS23760 | <b>ppnK</b> ; Inorganic polyphosphate/ATP-NAD kinase      | 2.6 | No       |
| GBAA_5656 | GBAA_RS27545 | <b>mdeA</b> ; Methionine gamma-lyase                      | 2.6 | Yes, 2.4 |
| GBAA_0175 | GBAA_RS01005 | <b>metQ</b> ; ABC transporter substrate-binding protein   | 2.6 | Yes, 2.8 |
| GBAA_3043 | GBAA_RS14940 | Uncharacterized protein                                   | 2.6 | No       |
| GBAA_5494 | GBAA_RS26765 | <b>yknW</b> ; Uncharacterized membrane protein            | 2.6 | No       |
| GBAA_3713 | GBAA_RS18055 | <b>hutP</b> ; histidine utilization antiterminator        | 2.6 | Yes, 2.7 |
| GBAA_4915 | GBAA_RS23860 | <b>acsA</b> ; Acetyl-CoA synthetase                       | 2.5 | No       |
| GBAA_5495 | GBAA_RS26770 | ABC transporter permease                                  | 2.5 | No       |
| GBAA_5541 | GBAA_RS27000 | <b>nuoB</b> ; NADH dehydrogenase subunit B                | 2.5 | Yes, 2.7 |
| GBAA_3046 | GBAA_RS14950 | Uncharacterized membrane protein                          | 2.5 | No       |
| GBAA_5253 | GBAA_RS25635 | Proline dehydrogenase                                     | 2.5 | No       |
| GBAA_0643 | GBAA_RS03500 | <b>rocE</b> ; Amino acid ABC transporter permease         | 2.5 | Yes, 2.7 |
| GBAA_1251 | GBAA_RS06425 | <b>trpC</b> ; Indole-3-glycerol phosphate synthase        | 2.5 | Yes, 3.0 |
| GBAA_2294 | GBAA_RS11395 | Aminotransferase                                          | 2.5 | No       |
| GBAA_4760 | GBAA_RS23130 | <b>etfB</b> ; Electron transfer flavoprotein subunit beta | 2.5 | No       |
| GBAA_5534 | GBAA_RS26965 | <b>nuoL</b> ; NADH dehydrogenase subunit L                | 2.5 | No       |
| GBAA_5045 | GBAA_RS24495 | Uncharacterized membrane protein                          | 2.5 | No       |
| GBAA_1193 | GBAA_RS06150 | Oligopeptide ABC transporter permease                     | 2.5 | No       |
| GBAA_5157 | GBAA_RS25165 | Hypothetical protein                                      | 2.5 | Yes, 2.4 |
| GBAA_2744 | GBAA_RS13535 | Acetyltransferase                                         | 2.5 | No       |
| GBAA_0240 | GBAA_RS01300 | <b>hppD</b> ; 4-hydroxyphenylpyruvate dioxygenase         | 2.5 | No       |
| GBAA_1528 | GBAA_RS07755 | Uncharacterized protein                                   | 2.5 | No       |
| GBAA_2242 | GBAA_RS11145 | <b>tatA</b> ; Twin-arginine translocation protein TatA    | 2.5 | Yes, 2.3 |
| GBAA_4326 | GBAA_RS21020 | <b>rbsR</b> ; LacI family transcriptional regulator       | 2.5 | No       |
| GBAA_4162 | GBAA_RS20215 | Uncharacterized protein                                   | 2.5 | No       |
| GBAA_4865 | GBAA_RS23625 | Uncharacterized membrane protein                          | 2.5 | Yes, 3.0 |

|           |              |                                                                          |      |           |
|-----------|--------------|--------------------------------------------------------------------------|------|-----------|
| GBAA_5655 | GBAA_RS27540 | <b>metaA</b> ; Homoserine O-succinyltransferase                          | 2.4  | Yes, 2.5  |
| GBAA_2658 | GBAA_RS13135 | Integral membrane protein                                                | 2.4  | No        |
| GBAA_4872 | GBAA_RS23660 | Uncharacterized membrane protein                                         | 2.4  | No        |
| GBAA_2041 | GBAA_RS10185 | Oligopeptide ABC transporter substrate-binding protein                   | 2.4  | No        |
| GBAA_1192 | GBAA_RS06145 | Oligopeptide ABC transporter permease                                    | 2.4  | No        |
| GBAA_2479 | GBAA_RS12280 | <b>ydhM</b> ; TetR family transcriptional regulator                      | 2.4  | No        |
| GBAA_1153 | GBAA_RS05975 | Uncharacterized membrane protein                                         | 2.4  | No        |
|           |              |                                                                          |      |           |
| GBAA_0845 | GBAA_RS04600 | <b>yvsH</b> ; Amino acid permease                                        | -3.6 | No        |
| GBAA_4909 | GBAA_RS23830 | Hypothetical protein                                                     | -3.3 | Yes, -4.2 |
| GBAA_4610 | GBAA_RS22415 | U32 family peptidase                                                     | -3.2 | No        |
| GBAA_0661 | GBAA_RS03590 | <b>glpT</b> ; Glycerol-3-phosphate transporter                           | -3.0 | No        |
| GBAA_4611 | GBAA_RS22420 | <b>yrrM</b> ; O-methyltransferase                                        | -3.0 | Yes, -2.6 |
| GBAA_0015 | GBAA_RS00115 | Deoxynucleoside kinase                                                   | -3.0 | No        |
| GBAA_0785 | GBAA_RS04315 | Na/Pi-cotransporter family protein                                       | -2.9 | Yes, -2.4 |
| GBAA_4430 | GBAA_RS21535 | Uncharacterized protein                                                  | -2.9 | Yes, -2.8 |
| GBAA_1298 | GBAA_RS06635 | <b>potB</b> ; Spermidine/putrescine ABC transporter permease             | -2.9 | No        |
| GBAA_0200 | GBAA_RS01125 | Carbohydrate transporter                                                 | -2.9 | No        |
| GBAA_1625 | GBAA_RS08215 | <b>queT</b> ; Queuosine transporter                                      | -2.8 | No        |
| GBAA_5267 | GBAA_RS25705 | Hypothetical protein                                                     | -2.8 | No        |
| GBAA_1403 | GBAA_RS07125 | <b>uppP2</b> ; UDP pyrophosphate phosphatase                             | -2.8 | No        |
| GBAA_0683 | GBAA_RS03700 | <b>uppP3</b> ; UDP pyrophosphate phosphatase                             | -2.8 | No        |
| GBAA_4501 | GBAA_RS21895 | Hypothetical protein                                                     | -2.7 | No        |
| GBAA_1299 | GBAA_RS06640 | <b>potC</b> ; Spermidine/putrescine ABC transporter permease             | -2.6 | No        |
| GBAA_0014 | GBAA_RS00110 | <b>dck</b> ; Deoxynucleoside kinase                                      | -2.6 | No        |
| GBAA_0673 | GBAA_RS03650 | Hypothetical protein                                                     | -2.5 | No        |
| GBAA_3896 | GBAA_RS18915 | Uncharacterized protein                                                  | -2.5 | Yes, -2.7 |
| GBAA_2336 | GBAA_RS11600 | <b>prsA</b> ; Peptidyl-prolyl isomerase                                  | -2.5 | No        |
| GBAA_3827 | GBAA_RS18585 | Hypothetical protein                                                     | -2.5 | No        |
| GBAA_0690 | GBAA_RS03735 | <b>brnQ1</b> ; Branched chain amino acid ABC transporter carrier protein | -2.5 | No        |
| GBAA_1301 | GBAA_RS06650 | PAP2 family protein                                                      | -2.5 | No        |
| GBAA_1713 | GBAA_RS08630 | <b>fliQ</b> ; Flagellar biosynthesis protein                             | -2.5 | No        |

|           |              |                                              |      |          |
|-----------|--------------|----------------------------------------------|------|----------|
| GBAA_4612 | GBAA_RS22425 | Uncharacterized protein                      | -2.5 | No       |
| GBAA_4684 | GBAA_RS22775 | <b>mreB</b> ; Rod shape determining protein  | -1.8 | No, -1.0 |
| GBAA_4683 | GBAA_RS22770 | <b>mreC</b> ; Cell shape determining protein | -1.9 | No, -0.8 |
| GBAA_4682 | GBAA_RS22765 | <b>mreD</b> ; Rod shape determining protein  | -1.9 | No, -0.6 |

### Non-synonymous SNPs Present in Strains

| Genome Location | SNP Type             | WT Strain | Hfq3 Mutant | Spo0A Mutant |
|-----------------|----------------------|-----------|-------------|--------------|
| GBAA_0995       | Nonsynonymous Coding | T         | T           | T            |
| GBAA_2880       | Frameshift           | G         | G           | G            |
| glsA-2          | Nonsynonymous coding |           | A           |              |
| GBAA_1548       | Insertion of a codon |           | ATAT        |              |

### References for Additional Experiment 1

- [1]. Vrentas C, Ghirlando R, Keefer A, Hu Z, Tomczak A, Gittis AG, et al. Hfq in *Bacillus anthracis*: Role of protein sequence variation in the structure and function of proteins in the Hfq family. *Protein Sci.* 2015;24:1808-19.
- [2]. Sastalla I, Rosovitz MJ, Leppla SH. Accidental selection and intentional restoration of sporulation-deficient *Bacillus anthracis* mutants. *Appl Environ Microbiol.* 2010;76:6318-6320.
- [3]. Sastalla I, Leppla SH. Occurrence, recognition, and reversion of spontaneous, sporulation-deficient *Bacillus anthracis* mutants that arise during laboratory culture. *Microbes Infect.* 2012;14:387-391.
- [4]. McKenzie AT, Pomerantsev AP, Sastalla I, Martens C, Rickfels SM, Virtaneva K, et al. Transcriptome analysis identifies *Bacillus anthracis* genes that respond to CO<sub>2</sub> through an AtxA-dependent mechanism.
- [5]. Langmead B, Salzberg S. Fast gapped-read alignment with Bowtie 2. *Nature Methods.* 2012;9:357-359.
- [6]. Robinson MD, McCarthy DJ, Smyth GK. edgeR: A Bioconductor package for differential expression analysis of digital gene expression data. *Bioinformatics.* 2010;26:139-140.
